1 **A longevity-specific bank of induced pluripotent stem cells from centenarians**  
2 **and their offspring**  
3

4 Todd W. Dowrey<sup>1,2</sup>, Samuel F. Cranston<sup>1,2</sup>, Nicholas Skvir<sup>1,2</sup>, Yvonne Lok<sup>1,2</sup>, Brian  
5 Gould<sup>3</sup>, Bradley Petrowitz<sup>3</sup>, Daniel Villar<sup>4</sup>, Jidong Shan<sup>4</sup>, Marianne James<sup>1</sup>, Mark  
6 Dodge<sup>1</sup>, Anna C. Belkina<sup>5,6</sup>, Richard M. Giadone<sup>7</sup>, Paola Sebastiani<sup>8</sup>, Thomas T. Perls<sup>3</sup>,  
7 Stacy L. Andersen<sup>3</sup>, George J. Murphy<sup>1,2</sup>.  
8

9 <sup>1</sup>Center for Regenerative Medicine of Boston University and Boston Medical Center,  
10 Boston, MA 02118

11 <sup>2</sup>Section of Hematology and Medical Oncology, Boston University School of Medicine,  
12 Boston, MA 02118

13 <sup>3</sup>Department of Medicine, Geriatrics Section, Boston University School of Medicine,  
14 Boston, MA, USA

15 <sup>4</sup>Albert Einstein College of Medicine, Bronx, NY 10461

16 <sup>5</sup>Flow Cytometry Core Facility, Boston University School of Medicine, Boston, MA, USA.

17 <sup>6</sup>Dept. of Pathology and Laboratory Medicine, Boston University School of Medicine,  
18 Boston, MA, USA

19 <sup>7</sup>Harvard University, Department of Stem Cell and Regenerative Biology, Cambridge,  
20 MA USA

21 <sup>8</sup>Institute for Clinical Research and Health Policy Studies, Tufts Medical Center, Boston,  
22 MA, USA  
23  
24  
25  
26  
27  
28  
29  
30  
31  
32  
33  
34  
35

36 Corresponding Author:

37 George J. Murphy, PhD

38 Associate Professor of Medicine

39 Department of Medicine

40 Boston University School of Medicine

41 Co-Founder Center for Regenerative Medicine (CReM)

42 670 Albany Street, 2nd Floor

43 Boston, MA 02118-2393

44 Telephone: 617-638-7541

45 Fax: 617-638-7530

46 e-mail: [gjmurphy@bu.edu](mailto:gjmurphy@bu.edu)

## 47 ABSTRACT

48  
49 Centenarians provide a unique lens through which to study longevity, healthy aging, and  
50 resiliency. Moreover, models of *human* aging and resilience to disease that allow for the  
51 testing of potential interventions are virtually non-existent. We obtained and characterized  
52 over 50 centenarian and offspring peripheral blood samples including those connected to  
53 functional independence data highlighting resistance to disability and cognitive  
54 impairment. Targeted methylation arrays were used in molecular aging clocks to compare  
55 and contrast differences between biological and chronological age in these specialized  
56 subjects. Isolated peripheral blood mononuclear cells (PBMCs) were then successfully  
57 reprogrammed into high-quality induced pluripotent stem cell (iPSC) lines which were  
58 functionally characterized for pluripotency, genomic stability, and the ability to undergo  
59 directed differentiation. The result of this work is a one-of-a-kind resource for studies of  
60 human longevity and resilience that can fuel the discovery and validation of novel  
61 therapeutics for aging-related disease.

## 62 INTRODUCTION

63  
64  
65 Individuals with exceptional longevity (EL) age more successfully than the general  
66 population by extending their healthspan and decreasing the proportion of their lives  
67 spent with aging-related disease, deemed the ‘compression of morbidity’<sup>1-4</sup>.  
68 Centenarians (>100 years of age) provide a unique lens through which to study EL,  
69 healthy aging, and disease resilience and resistance<sup>5,6</sup>. In the last decade, several studies  
70 have provided evidence that centenarians exhibit delayed onset or escape aging-related  
71 diseases such as cancer, cardiovascular disease, and Alzheimer’s disease (AD) while  
72 markedly delaying disability<sup>4,6,7</sup>. Although recent work has identified genetic variants  
73 associated with healthful aging, insights into how these elements promote longevity  
74 remain unclear<sup>8</sup>. Understanding the regulatory networks that promote resistance to aging-  
75 related disease may provide mechanistic insights into this process and inform the  
76 development of therapeutics to slow or reverse aging. Problematically, however, models  
77 of *human* aging, longevity, and resistance to and/or resilience against disease that allow  
78 for the functional testing of potential interventions are virtually non-existent.

79  
80 Induced pluripotent stem cells (iPSCs) faithfully capture the genetic background of the  
81 person from whom they are created and are revolutionizing pre-clinical drug screening by  
82 exhibiting the power of precision medicine. Beginning soon after their initial discovery,  
83 iPSCs have been used to model diseases as well as screen drugs for the treatment of  
84 amyotrophic lateral sclerosis<sup>9</sup>, spinal muscular atrophy<sup>10</sup>, and other neurodegenerative<sup>11</sup>  
85 and muscular<sup>12</sup> disorders. Notably and importantly, these model systems have been  
86 applied to and faithfully recapitulate disease pathologies associated with aging that  
87 manifest late in life, such as in AD<sup>13-17</sup> and in our own work on familial ATTR-  
88 amyloidosis<sup>18-21</sup>. The versatility in these systems to produce any cell and tissue type of  
89 the body allows for interrogation of multiple, aging-impacted tissues, many of which have  
90 been demonstrated to age at different rates<sup>22</sup>. This potential utility of iPSCs in aging  
91 research has recently been highlighted as a platform for both longevity studies as well as  
92 drug discovery<sup>23</sup>. EL iPSCs also provide a complement for studies performed on aging

disease-specific lines, such as those derived from patients with Progeria<sup>24,25</sup>, given their potential in understanding mechanisms that embolden resiliency and resistance to accelerated aging-related disease.

Here, we report a novel bank of longevity-specific peripheral blood mononuclear cells (PBMCs) and resultant iPSCs from subjects with EL. The result of this work is a highly characterized, one-of-a-kind resource that can aid in a host of aging-related studies. This flexible iPSC library represents a unique, permanent resource that can be harnessed by any investigator for molecular and functional analyses of resiliency, longevity, and aging. It also provides a much-needed human platform for the discovery of novel geroprotective agents and/or the validation of findings from other data banks, tissue repositories, or models. Lastly, our ability to connect detailed phenotypic data obtained from the subjects as well as molecular and biological aging data to the created lines enables the identification of those at the extremes of both physical and cognitive functionality for study.

## RESULTS

### Identification and characterization of individuals displaying exceptional longevity

PBMCs were collected from 36 centenarians (mean age at last contact/death  $104.58 \pm 3.5$  years, 56% females), 16 offspring (mean age at last contact  $72.8 \pm 7.3$  years, range 60-86 years, 69% females), and 2 non-EL offspring spouses ( $85.5 \pm 4.9$  years, 0% females) (**Table 1**). Among the centenarians for whom cognitive and/or functional status could be determined at age 100, 73% (8/11) were cognitively healthy and 76% were Activities of Daily Living (ADL) independent at age 100 years. Among offspring with sufficient data to characterize current cognitive and/or functional status, 82% (9/11) were cognitively healthy and 100% (n=14) were independent in performing Instrumental Activities of Daily Living (IADLs) at the time of assessment. For investigators seeking additional protected phenotypic data on study participants, applications can be made to the ELITE portal data hub (<https://eliteportal.synapse.org/>) where this information is securely housed.

### Comparisons of biological versus chronological age in EL subjects

Methylation profiling was performed with Illumina Infinium arrays on 18 subjects in this bank which allowed for estimation of biological age through established aging clocks, including the pan-tissue Horvath DNAmAge<sup>26,27</sup> clock, Hannum<sup>28</sup>, DunedinPACE<sup>29</sup>, and PhenoAge<sup>30</sup> clocks, as well as a recently published aging clock trained on datasets that included a relatively high proportion of centenarians (ENCen40+)<sup>31</sup> (**Figure 1**). This panel of epigenetic clocks comprises a wide array of models, trained on both chronological and phenotypic measurements, and spanning multiple generations of Illumina methylation chips. To facilitate compatibility between each of these models with the newest Illumina beadchips, imputation for the small subsets of missing CpGs for each model was performed where applicable (see methods). Despite differences in newer generation (Illumina EPICv2) versus older generation methylation arrays, estimates and model behavior seen with our samples were largely in line with expectations. Models trained on the older Illumina 27k/450k arrays saw accurate age prediction in younger individuals

139 (Horvath median absolute error (MAE) = 3.67 / Pearson correlation coefficient (R) = 0.93,  
140 Hannum MAE = 4.42 / R = 0.94 on non-centenarian samples), as well as a general under-  
141 predictive trend in EL samples. Meanwhile, clocks measuring putative biological aging  
142 (PhenoAge, DunedinPACE) showed similarly consistent correlation. PhenoAge showed  
143 a correlation coefficient of 0.94 with chronological age, while DunedinPACE centered  
144 around an average value of 1 (representing the age acceleration of a healthy adult) with  
145 gradual increase in the age acceleration of chronologically older individuals (R=0.62) as  
146 noted by the authors in the original manuscript<sup>29</sup>. Based on the spectrum of clocks  
147 employed, the centenarians in this bank mapped biologically younger to varying extents.  
148 Notably, the ENCen40+ clock estimated an average 6.0 year reduction in biological age  
149 and a much higher average degree of accuracy in centenarians relative to other current  
150 models. These data reflected the relative health metrics and clinical history associated  
151 with each subject, with those displaying functional independence and higher cognitive  
152 function having the most pronounced reduction in biological age. Interestingly, EL  
153 offspring displayed more variable biological age status, with some subjects estimated to  
154 have a higher biological age as well as some estimated to have a lower biological age  
155 (**Figure 1**). The greater variation in the offspring may be the result of greater  
156 heterogeneity in the presence or absence of genetic signatures associated with EL. Of  
157 note, a subset of the PBMCs collected in this study were also characterized via single cell  
158 RNA sequencing and CITEseq analyses<sup>32</sup>, as well as a 40-color flow cytometry panel to  
159 extensively examine immune cell subtypes and identify unique features in EL subjects  
160 (**Supplementary Figures 1-2**).

### 161 **Establishment and characterization of a longevity-specific iPSC bank**

162 Of the 54 subjects from which PBMCs were collected and isolated, 19 iPSC lines have  
163 been generated across EL sub-groups (**Table 2**). All lines were created using our  
164 established methodologies<sup>33-36</sup> with at least three independent clones generated from  
165 each subject. All lines met stringent quality control parameters for pluripotency and  
166 functionality<sup>33-36</sup> and were expanded to facilitate sharing in an opensource approach.  
167 Briefly, each line was characterized for pluripotency using TRA-1-81 expression (**Figure**  
168 **2a**), as well as for genomic integrity via karyotype analysis (**Figure 2b**). Although  
169 otherwise karyotypically normal, 3 male centenarians displayed mosaic loss of y  
170 chromosome (**Figure 2c**). Lastly, teratoma assays were also performed to confirm  
171 pluripotency and the ability to generate tissue types representative of all three germ  
172 layers<sup>34,37,38</sup> (**Figure 2d**). Importantly, regardless of subject age, no failures in iPSC  
173 generation or pluripotency competence were observed.

### 174 **Forward programming of EL-specific iPSCs into cortical neurons**

175 As a demonstration of the potential of the established EL-specific iPSC lines to undergo  
176 directed differentiation, and as neuronal cell types are impacted by many aging-related  
177 diseases with large socioeconomic burden, we conducted transcription factor-mediated  
178 differentiation to forebrain cortical neurons using established methods<sup>39,40</sup>. Briefly, cells  
179 were engineered to have doxycycline-inducible expression of the neuronal transcription  
180 factor neurogenin 2 (NGN2) via transposase-mediated integration. Upon a 3-day NGN2  
181 induction using doxycycline, cultures comprised of neural progenitor cells that were  
182 replated onto a specialized matrix of laminin and fibronectin and allowed to mature for 14  
183  
184

185 days in neuronal BrainPhys (STEMCELL Technologies) media supplemented with growth  
186 factors NT3, BDNF, and B27. Resulting iPSC-derived neurons (iNeurons) displayed  
187 uniform morphology and expression of neuronal markers TUJ1<sup>41,42</sup> and ISLET1/2<sup>43,44</sup>  
188 (**Figure 3**). All lines tested performed comparably in their ability to efficiently generate  
189 iNeurons.

### 190 **Subject Consent and Global Distribution of Created Lines**

191 All of the iPSC lines in this bank were created from subjects using a consent form under  
192 the Boston University Institutional Review Board (H32506). This consent form includes a  
193 comprehensive template that allows for the unrestricted sharing of deidentified created  
194 lines, including potential commercialization and sharing of lines with commercial entities.  
195 As a resource to investigators, this consent form has been included as Supplemental  
196 Information.

### 197 **DISCUSSION**

200 Longevity is multifactorial and complex with a variety of environmental, lifestyle, and  
201 genetic determinants<sup>45,46</sup>. EL offspring demonstrate higher resistance to aging-  
202 associated diseases<sup>5,7,47-50</sup> and they map younger in aging rate estimators than age-  
203 matched controls<sup>51,52</sup>. This last point is demonstrated in our cohort and in our application  
204 of a series of biological aging clocks. Biological aging clocks have emerged as a  
205 prominent tool for measuring and understanding the aging process at a molecular  
206 level<sup>27,30,53,54</sup>. Driven by advances in high-throughput sequencing, computational biology,  
207 and machine learning algorithms, researchers are continuously refining existing clocks,  
208 developing novel clock architectures, and expanding potential applications. In our study,  
209 we observed that many of the centenarians in our cohort demonstrated either significant  
210 differences in the comparison of biological to chronological age or slower rates of aging,  
211 even though studies have demonstrated that our rate of aging increases over a  
212 lifespan<sup>29,55</sup>. Moreover, genetic variants have been identified which are associated with  
213 longevity<sup>8,46,56</sup> and resistance to aging-related diseases such as AD<sup>57,58</sup>. However,  
214 mechanistic insight into how these elements promote longevity remains speculative,  
215 highlighting the need for scalable human *in vitro* models that can be used to understand  
216 the gene and regulatory networks that promote resistance to or resilience against aging-  
217 related disease and inform the development of therapeutics which may slow or reverse  
218 aging.

219 As a step toward filling this gap in understanding, we have leveraged access to  
220 centenarians and their offspring in the New England Centenarian Study (NECS)<sup>46</sup>, the  
221 Longevity Consortium Centenarian Project (LCCP), and Integrative Longevity Omics  
222 (ILO) studies to build an EL-specific library of biomaterial from these exceptionally long-  
223 lived subjects. Using PBMC samples from these individuals, we demonstrated the ability  
224 to efficiently generate high-quality, fully pluripotent iPSCs regardless of subject age. This  
225 unique resource provides an unlimited amount of longevity-specific biomaterial (e.g.,  
226 genomic DNA) and enables the generation of a multitude of cell and tissue types of aging-  
227 related interest to fuel longevity research and aid in the development and validation of  
228 novel geroprotective agents in a human model system. The ability to generate and assay  
229  
230

multiple cell types is valuable, as tissue and organ systems have been shown to age at different rates<sup>22,59</sup>. Complementing the molecular profiling performed on the PBMCs of the subjects in our bank, we have curated associated demographics and cognitive and physical function characterizations of the subjects to highlight the relative health and functionality of the participants and their associated iPSC lines. These data should allow for more informed choices of which iPSC lines are best suited for particular research questions or screening applications in aging-related diseases such as neurodegeneration, where lines derived from those with resiliency or resistance to cognitive decline could serve as valuable models.

Interestingly, during the characterization process, although they were otherwise karyotypically normal, it was noted that a subset of the male centenarian iPSC lines displayed complete loss of the Y chromosome. This mosaic loss of Y (mLOY) has been previously identified in the PBMCs of males over 70 and may be a biomarker for aging and susceptibility to and prevalence for aging-related diseases such as cancer and cardiovascular disease<sup>60-62</sup>. Moreover, and conversely to that seen in centenarians, mLOY is also associated with a significant increase in all-cause mortality<sup>61</sup>. The inclusion of 3 male centenarians displaying mLOY in our bank allows for interesting research opportunities into the modeling and understanding of this phenomenon. Intriguing possibilities include the use of these particular centenarian lines to identify compensatory mechanisms against the deleterious impact of mLOY or the possibility that mLOY in these individuals is a beneficial adaptation for longevity. Additionally, we demonstrated that iPSC lines in this bank, including those with mLOY, are capable of competent differentiation to produce forebrain cortical neurons. As cortical neurons represent cell types of the central nervous system majorly impacted by the aging process and are intricately involved in aging-related decline, the ability to generate unlimited numbers of this target cell population from subjects who are potentially resistant to disease should prove to have great utility. Moreover, the inherent flexibility of an iPSC-based system also allows for the creation of a multitude of aging-impacted tissue types which can also be used in this capacity.

The use of iPSC-based platforms to study aging has received skepticism due to the loss of epigenetic information in resulting cells which is a byproduct of the reprogramming process<sup>63</sup>. Interestingly, this same process has gained interest in the context of rejuvenation, where the transient expression of the Yamanaka factors may return a cell to a more youthful state without the loss of cell identity, deemed 'partial reprogramming'<sup>64-66</sup>. The epigenetic landscape and its associated changes across a lifetime have been identified as a hallmark of aging<sup>45,67,68</sup>. However, the genetics of an individual, which strongly impact longevity particularly at extreme ages<sup>5,46,47</sup>, are faithfully captured in iPSCs, enabling the potential discoveries that may arise from this level of information. Additionally, the reset iPSC epigenetic landscape presents a unique opportunity to simulate 'aging in a dish' by performing directed differentiations into distinct cell types, thereby reinitiating methylation changes and reinstalling a defined epigenetic landscape.

iPSC-based systems have revolutionized the modeling of genetic disorders and shown the ability to model diseases that manifest late in life<sup>18-20,69-71</sup>. These platforms allow for

277 a variety of molecular studies to be performed, including those that employ novel gene  
278 editing tools to perturb specific genes and pathways associated with longevity. Here, we  
279 provide a unique resource of longevity-specific biomaterial that can be leveraged to build  
280 human *in vitro* models of aging-related disease and screen potential countermeasures.  
281 Models of *human* aging, longevity, and resilience to disease that allow for the functional  
282 testing of potential interventions are virtually non-existent. This resource directly  
283 addresses this limitation, while also allowing for cross-validation of the functional results,  
284 identified pathways, and observed signatures across other model systems and  
285 laboratories, a major point of concern in the rapidly emerging field of geroscience.

## 287 METHODS

### 289 *Identification of subjects and curation of clinical history:*

290 Centenarians were identified from voter registries, mailings to adult living communities  
291 and long-term care facilities, news articles, and direct participation inquiries to the NECS,  
292 LCCP, or ILO studies. Offspring of living or deceased centenarians were also invited to  
293 participate. Spouses of the enrolled offspring were invited to participate as a referent  
294 group without familial longevity. Centenarian, offspring, and spouse participants complete  
295 self-administered questionnaires to collect sociodemographic, medical history, and  
296 physical function data. Participants also complete cognitive screeners and a  
297 neuropsychological and physical assessment by video conference or telephone. An  
298 informant reported on the presence of cognitive and psychiatric problems in the  
299 participant's daily life. Comprehensive phenotypic data are available from the ELITE  
300 portal (<https://eliteportal.synapse.org/>). A convenience sample of NECS, LCCP, and ILO  
301 participants was selected for PBMC collection.

303 Functional independence for centenarians was defined as a score of 80-100 on the  
304 Barthel Activities of Daily Living Index (ADLs)<sup>72</sup>, a measure of independence in performing  
305 basic self-care. For the offspring and spouses, functional independence in performing  
306 independent living skills such as using a telephone and managing finances, known as  
307 Instrumental Activities of Daily Living (IADLs), was defined a score of 14 out of a possible  
308 score of 14 on the OARS Multidimensional Functional Assessment Questionnaire<sup>73</sup>.  
309 Cognitive status (i.e., cognitively healthy versus cognitively impaired) was determined by  
310 clinical consensus review of neuropsychological assessment scores or, if not available,  
311 from cognitive screeners (i.e., the Blessed Information Memory Concentration Test<sup>74</sup> or  
312 the Telephone Interview for Cognitive Status<sup>75</sup>).

### 314 *Collection and isolation of PBMCs:*

315 Peripheral blood samples were procured from subjects with EL in the NECS<sup>46</sup>, the LCCP  
316 (<https://www.longevityconsortium.org/>), and the ILO Study (<https://longevityomics.org/>),  
317 including centenarians and their offspring. Additionally, age-matched spouse controls  
318 with no history of EL were collected as controls. In most cases, samples were immediately  
319 processed and frozen following isolation of PBMCs via Ficoll gradient. Peripheral blood  
320 was drawn and collected into BD Vacutainer™ Glass Mononuclear Cell Preparation  
321 (CPT) Tubes (BD 362761). These samples were then centrifuged at 1800 rpm for 30  
322 minutes at room temperature (RT) to separate the blood plasma, PBMC buffy coat, and

323 packed red blood cells. The buffy coat was extracted and washed with phosphate buffer  
324 saline (PBS) and centrifuged at 300 x G for 10 minutes at RT. The cell pellet was  
325 resuspended in PBS, counted, and cells were pelleted by centrifugation at 300 x G for 10  
326 minutes at RT. Cells were resuspended at  $8.0 \times 10^6$  cells/mL in resuspension buffer and  
327 further diluted to  $4.0 \times 10^6$  cells/mL in freezing medium according to the 10X Genomics  
328 protocol (CG00039 Rev D). Cells were then transferred into cryovials and frozen at -80C  
329 before being transferred to long term -150°C storage.

330  
331 *Multiparameter flow cytometry characterization of PBMCs:*

332 Cytometry characterization was performed according to OMIP-069 protocol 1<sup>76</sup> detailing  
333 panel design, validation, and sample staining and acquisition. Frozen PBMCs were  
334 thawed rapidly and pelleted via centrifugation. Cells were stained with Live/Dead Fixable  
335 Blue dye (ThermoFisher L34961), washed, blocked with Human FcBlock (BioLegend  
336 422301) and stained with a panel of 40 fluorescent reagents (**Supplementary Table 1**)  
337 supplemented with Monocyte Blocker (BioLegend 426102) and Brilliant Buffer Plus (BD  
338 Biosciences 566385). This cell mixture was allowed to stain for 30 min on ice and then  
339 washed. Ultracomp beads (ThermoFisher 011-2222-42) and control PBMCs were used  
340 to include single-stain controls. Cells and beads were then analyzed on a 5-laser Aurora  
341 spectral flow cytometer (Cytek Biosciences). At least 500,000 cells were recorded for  
342 each PBMC sample. Data were processed in SpectoFlo 2.2 (Cytek Biosciences) to  
343 generate unmixed features. OMIQ cloud platform was used to perform data cleanup and  
344 computational analysis. Live single CD45+ single cell datapoints were projected into two-  
345 dimensional space using PCA-informed opt-SNE dimensionality reduction algorithm<sup>77</sup>  
346 and FlowSOM<sup>78</sup> clustering of the same datapoints was overlaid to visualize biological  
347 population representation. FlowSOM metaclusters were annotated based on established  
348 phenotypic characteristics of the populations.

349  
350 *Targeted methylation arrays and estimation of biological age:*

351 Isolation and purification of DNA: PBMCs were thawed rapidly, and DNA was extracted  
352 using the Qiagen DNeasy Blood and Tissue Kit (69506). Samples were submitted  
353 according to CD Genomics standards for Illumina Infinium MethylationEPIC v2.0 array.

354  
355 *Methylation data quality control and pre-processing:*

356 Quality control metrics for all Infinium MethylationEPIC v2.0 samples were generated  
357 through the sesameQC\_calcstats function in the SeSAmE R package (v1.20.0) on  
358 Bioconductor (v3.18)<sup>79</sup>. as detailed in their vignette. Beta values for each sample were  
359 obtained from idat files run through the openSesame pipeline from the same package as  
360 above, utilizing their recommended preprocessing for human EPICv2 samples.  
361 Preprocessing included quality masking for probes of poor design, dye bias correction,  
362 detection p-value masking, and background subtraction. Additionally, the EPICv2 array  
363 contains some duplicate CpGs across the 900k probes in its microarray, as well as  
364 additional suffixes added to probe IDs that reflect design information. To align these  
365 identifiers with those from models developed on earlier platforms and facilitate  
366 compatibility, the SeSAmE options collapseToPfx = TRUE, and collapseMethod = "mean"  
367 were utilized within the beta calling function, in order to remove suffixes, and average the  
368 betas from duplicate probes into a single value.



369  
370  
371  
372  
373  
374  
375  
376  
377  
378  
379  
380  
381  
382  
383  
384  
385  
386  
387  
388  
389  
390  
391  
392  
393  
394  
395  
396  
397  
398  
399  
400  
401  
402  
403  
404  
405  
406  
407  
408  
409  
410  
411  
412  
413

*Generating methylation clock estimates:*

Estimates from several high-profile age prediction models were performed with the methylation values generated from our samples. The models used were the original Horvath clock<sup>27</sup>, the Hannum clock<sup>28</sup>, a centenarian clock (ENCen40+)<sup>31</sup>, PhenoAge<sup>30</sup>, and DunedinPACE<sup>29</sup>. The Illumina EPICv2 platform comprises a new set of CpGs, which largely overlaps those found in EPICv1 and earlier platforms, but not entirely. As a result, each of these models had a small number of CpGs whose values were imputed to generate estimates as accurately as possible. For each model, imputation was followed as detailed in the corresponding manuscripts, if available. Otherwise, mean beta values were imputed from an external dataset belonging to the same Illumina platform on which a model was trained. For the Horvath 2013 model, approximately 13 of the 353 CpGs (3.68%) were missing from EPICv2, and missing values were obtained using mean DNAm values from a gold standard dataset detailed in the original supplement S2 (materials and methods) of the manuscript. Imputation with the centenarian clock (ENCen40+), as well as the PhenoAge clock, was done using mean DNAm values of the controls from a peripheral blood EPICv1 dataset GSE157252<sup>80</sup> to supplement missing values for 39 of the 559 CpGs (6.98%) used by ENCen40+ and the 18 of 513 (3.51%) used by PhenoAge respectively. For the Hannum model, 7 CpGs of the 71 were missing (9.86%), and imputation was performed using the GSE40279 dataset (Illumina 450k) used in his original manuscript. Lastly, predictions for the DunedinPACE clock were generated using the Github repository (<https://github.com/danbelsky/DunedinPACE>) maintained by the authors. This repository has been independently updated to work with EPICv2 data, as the authors note that 29 of the 173 CpGs (16.76%) from the original model no longer appear in the new methylation array. The authors of this model utilize a similar approach of substitution of averages from Dunedin beta values for correction of missing data from their model, as well as for a panel of 19,827 probes for background normalization in the calculations.

*iPSC creation, expansion, and distribution:*

Previously isolated and frozen PBMCs were thawed rapidly and erythroblasts were expanded using erythroblast expansion medium (EM) for 9 days. A comprehensive methodology concerning cell collection, expansion, and our approach to reprogramming can be found in Sommer et al., 2012. Following expansion, the cells were counted and  $2.0 \times 10^5$  cells were transduced using the Invitrogen™ CytoTune™-iPS 2.0 Sendai Reprogramming Kit (A16517). The next day, cells were collected and transferred onto matrigel-coated wells. Over the first 5 days post-transduction, the cells were slowly transferred to ReproTeSR (STEMCELL Technologies 05926) by adding the ReproTeSR on days 3 and 5 without aspirating the existing EM. From day 5 onward, the cells were cultured fully in ReproTeSR. Once colonies adhered and were large enough, a cross-hatching method was used to divide each colony and passage onto a Matrigel-coated well to establish a clonal culture. These clones were expanded to at least 30 early passage vials and stored for sharing with the longevity community.

*Teratoma assay:*

3 female NU/NU immunocompromised mice (Jackson Labs strain#002019) per subject were injected subcutaneously with  $1 \times 10^6$  iPSCs (controlled for passage number) from each respective iPSC line suspended in high content Matrigel (Corning™ 354263) supplemented with 10 $\mu$ M Y27632 (Reprocell). Mice were monitored for teratoma formation for up to 20 weeks. Following teratoma development, the mass was resected, fixed in 4% PFA at room temperature overnight, and paraffin embedded and sectioned for hematoxylin and eosin staining.

*Forward programming of iPSCs to cortical neurons:*

Neurogenin 2 (NGN2) was expressed in iPSC lines using a tetracycline inducible promoter (Addgene 172115) integrated using Piggybac plasmid EFa1-Transposase (Addgene plasmid 172116) via lipofectamine (ThermoFisher STEM00015) as described previously<sup>39</sup>. Selection was performed after 48 hours using 2  $\mu$ g/mL puromycin for 14 days. Stably integrated lines were dissociated with accutase (ThermoFisher A1110501) and plated at single-cell onto matrigel coated plates with induction media containing 10  $\mu$ M Y-27632 and 2  $\mu$ g/mL doxycycline (Sigma D9891) as previously described<sup>40</sup>. Following 3 days in induction medium containing doxycycline, cells were dissociated using accutase (ThermoFisher A1110501) and plated onto poly-L-ornithine (Sigma P4957), poly-D-lysine (Gibco A3890401), 10  $\mu$ g/mL Fibronectin (Corning 356008) and 10  $\mu$ g/mL Laminin (Gibco 23017015) coated plates in cortical neuron culture medium (CM) containing B27 (Gibco 17504044), BDNF (R&D Technologies 248-BDB) and NT3 (R&D Technologies 267-N3)<sup>40</sup>. Cells were patterned for 14 days in this medium before being used for downstream assays.

*Immunofluorescence:*

Cells were washed with PBS and fixed using 4% paraformaldehyde (Electron Microscopy Sciences 15714S) for 20 minutes at room temperature. Cells were permeabilized and blocked using 5% Fetal bovine serum (ThermoFisher 16141079), 0.3% Triton X-100 (Sigma T8787), and 2% bovine serum albumin (Gibco 15260037) diluted in PBS for 1 hour at RT. Cells were stained with primary antibodies (**Supplementary Table 2**) diluted in block/perm buffer overnight at 4°C. Cells were then washed 3 times with block/perm buffer and stained with corresponding secondary antibodies for 30 minutes at RT. Cells were washed 3 times with block/perm buffer and stained with Dapi nuclear stain (ThermoFisher 62248) diluted in fix/perm buffer for 10 minutes at RT. Cells were washed 3 times with block/perm buffer and imaged.

## ACKNOWLEDGMENTS

GJM, TP, PS, and SA are funded by NIH-NIA (UH3 AG064704 U19 AG073172). Stephen Gayle, Lance San Souci, and Christos Meimeteas assisted with sample collection.

## REFERENCES

1. Fries, J. F. Aging, Natural Death, and the Compression of Morbidity. *The New England Journal of Medicine* **303**, 130–135 (1980).
2. Fries, J. F., Bruce, B. & Chakravarty, E. Compression of Morbidity 1980–2011: A Focused Review of Paradigms and Progress. *Journal of Aging Research* **2011**, 261702 (2011).
3. Hitt, R., Young-Xu, Y., Silver, M. & Perls, T. Centenarians: the older you get, the healthier you have been. *The Lancet* **354**, 652 (1999).
4. Evert, J., Lawler, E., Bogan, H. & Perls, T. Morbidity Profiles of Centenarians: Survivors, Delayers, and Escapers. *The journals of gerontology. Series A, Biological sciences and medical sciences* **58**, 232-M237 (2003).
5. Andersen, S. L. Centenarians as Models of Resistance and Resilience to Alzheimer’s Disease and Related Dementias. *Adv Geriatr Med Res* **2**, e200018 (2020).
6. Andersen, S. L., Sebastiani, P., Dworkis, D. A., Feldman, L. & Perls, T. T. Health span approximates life span among many supercentenarians: compression of morbidity at the approximate limit of life span. *J Gerontol A Biol Sci Med Sci* **67**, 395–405 (2012).
7. Terry, D. F., Wilcox, M. A., McCormick, M. A. & Perls, T. T. Cardiovascular Disease Delay in Centenarian Offspring. *The journals of gerontology. Series A, Biological sciences and medical sciences* **59**, 385-M389 (2004).
8. Lin, J.-R. *et al.* Rare genetic coding variants associated with human longevity and protection against age-related diseases. *Nature Aging* **1**, 783–794 (2021).
9. Egawa, K. *et al.* Decreased Tonic Inhibition in Cerebellar Granule Cells Causes Motor Dysfunction in a Mouse Model of Angelman Syndrome. *Science Translational Medicine* **4**, 163ra157 (2012).

- 483 10. Ebert, A. D. *et al.* Induced pluripotent stem cells from a spinal muscular atrophy patient. *Nature*  
484 **457**, 277–280 (2009).
- 485 11. Okano, H. & Morimoto, S. iPSC-based disease modeling and drug discovery in cardinal  
486 neurodegenerative disorders. *Cell Stem Cell* **29**, 189–208 (2022).
- 487 12. Rashid, M. I. *et al.* Simple and efficient differentiation of human iPSCs into contractible skeletal  
488 muscles for muscular disease modeling. *Sci Rep* **13**, 8146 (2023).
- 489 13. Jorfi, M., D’Avanzo, C., Kim, D. Y. & Irimia, D. Three-Dimensional Models of the Human Brain  
490 Development and Diseases. *Advanced Healthcare Materials* **7**, 1700723 (2018).
- 491 14. Jorfi, M., D’Avanzo, C., Tanzi, R. E., Kim, D. Y. & Irimia, D. Human Neurospheroid Arrays for In  
492 Vitro Studies of Alzheimer’s Disease. *Scientific Reports* **8**, 2450 (2018).
- 493 15. Quinti, L., Park, J., Brand, E., Tanzi, R. E. & Kim, D. Y. Neurotherapeutics in the Era of  
494 Translational Medicine. 311–331 (2021) doi:10.1016/b978-0-12-816475-4.00014-8.
- 495 16. Cenini, G. *et al.* Dissecting Alzheimer’s disease pathogenesis in human 2D and 3D models.  
496 *Molecular and Cellular Neuroscience* **110**, 103568 (2020).
- 497 17. Park, J. *et al.* A 3D human triculture system modeling neurodegeneration and neuroinflammation  
498 in Alzheimer’s disease. *Nat Neurosci* **21**, 941–951 (2018).
- 499 18. Giadone, R. M. *et al.* Expression of Amyloidogenic Transthyretin Drives Hepatic Proteostasis  
500 Remodeling in an Induced Pluripotent Stem Cell Model of Systemic Amyloid Disease. *Stem Cell*  
501 *Reports* **15**, 515–528 (2020).
- 502 19. Giadone, R. M. *et al.* A library of ATTR amyloidosis patient-specific induced pluripotent stem cells  
503 for disease modelling and in vitro testing of novel therapeutics. *Amyloid* **25**, 1–8 (2018).
- 504 20. Ghosh, S. *et al.* Mapping cellular response to destabilized transthyretin reveals cell- and  
505 amyloidogenic protein-specific signatures. *Amyloid* **0**, 1–15 (2023).

- 506 21. Leung, A. *et al.* Induced Pluripotent Stem Cell Modeling of Multisystemic, Hereditary Transthyretin  
507 Amyloidosis. *Stem Cell Reports* **1**, 451–463 (2013).
- 508 22. Nie, C. *et al.* Distinct biological ages of organs and systems identified from a multi-omics study.  
509 *Cell Rep* **38**, 110459 (2022).
- 510 23. Pitrez, P. R. *et al.* Cellular reprogramming as a tool to model human aging in a dish. *Nat Commun*  
511 **15**, 1816 (2024).
- 512 24. Monnerat, G. *et al.* Modelling premature cardiac aging with induced pluripotent stem cells from a  
513 hutchinson-gilford Progeria Syndrome patient. *Front Physiol* **13**, 1007418 (2022).
- 514 25. Daily, N., Elson, J. & Wakatsuki, T. Aging Model for Analyzing Drug-Induced Proarrhythmia Risks  
515 Using Cardiomyocytes Differentiated from Progeria-Patient-Derived Induced Pluripotent Stem  
516 Cells. *Int J Mol Sci* **24**, 11959 (2023).
- 517 26. Horvath, S. *et al.* Epigenetic clock for skin and blood cells applied to Hutchinson Gilford Progeria  
518 Syndrome and ex vivo studies. *Aging (Albany NY)* **10**, 1758–1775 (2018).
- 519 27. Horvath, S. DNA methylation age of human tissues and cell types. *Genome biology* **14**, R115  
520 (2013).
- 521 28. Hannum, G. *et al.* Genome-wide Methylation Profiles Reveal Quantitative Views of Human Aging  
522 Rates. *Molecular Cell* **49**, 359–367 (2013).
- 523 29. Belsky, D. W. *et al.* DunedinPACE, a DNA methylation biomarker of the pace of aging. *eLife* **11**,  
524 e73420.
- 525 30. Levine, M. E. *et al.* An epigenetic biomarker of aging for lifespan and healthspan. *Aging* **10**, 573–  
526 591 (2018).
- 527 31. Dec, E. *et al.* Centenarian clocks: epigenetic clocks for validating claims of exceptional longevity.  
528 *GeroScience* (2023) doi:10.1007/s11357-023-00731-7.

- 529 32. Karagiannis, T. T. *et al.* Multi-modal profiling of peripheral blood cells across the human lifespan  
530 reveals distinct immune cell signatures of aging and longevity. *eBioMedicine* 104514 (2023)  
531 doi:10.1016/j.ebiom.2023.104514.
- 532 33. Somers, A. *et al.* Generation of Transgene-Free Lung Disease-Specific Human Induced  
533 Pluripotent Stem Cells Using a Single Excisable Lentiviral Stem Cell Cassette. *STEM CELLS* **28**,  
534 1728–1740 (2010).
- 535 34. Sommer, C. A. *et al.* Induced Pluripotent Stem Cell Generation Using a Single Lentiviral Stem Cell  
536 Cassette. *STEM CELLS* **27**, 543–549 (2009).
- 537 35. Sommer, A. G. *et al.* Generation of Human Induced Pluripotent Stem Cells from Peripheral Blood  
538 Using the STEMCCA Lentiviral Vector. *Journal of Visualized Experiments* e4327 (2012)  
539 doi:10.3791/4327.
- 540 36. Park, S. *et al.* A Comprehensive, Ethnically Diverse Library of Sickle Cell Disease-Specific  
541 Induced Pluripotent Stem Cells. *Stem Cell Reports* **8**, 1076–1085 (2017).
- 542 37. Takahashi, K. & Yamanaka, S. Induction of Pluripotent Stem Cells from Mouse Embryonic and  
543 Adult Fibroblast Cultures by Defined Factors. *Cell* **126**, 663–676 (2006).
- 544 38. Müller, F.-J., Goldmann, J., Löser, P. & Loring, J. F. A Call to Standardize Teratoma Assays Used  
545 to Define Human Pluripotent Cell Lines. *Cell Stem Cell* **6**, 412–414 (2010).
- 546 39. Pantazis, C. B. *et al.* A reference human induced pluripotent stem cell line for large-scale  
547 collaborative studies. *Cell Stem Cell* **29**, 1685-1702.e22 (2022).
- 548 40. Fernandopulle, M. S. *et al.* Transcription Factor–Mediated Differentiation of Human iPSCs into  
549 Neurons. *Current Protocols in Cell Biology* **79**, e51 (2018).

- 550 41. Alexander, J. E. *et al.* Characterization of posttranslational modifications in neuron-specific class  
551 III beta-tubulin by mass spectrometry. *Proceedings of the National Academy of Sciences* **88**,  
552 4685–4689 (1991).
- 553 42. Memberg, S. P. & Hall, A. K. Dividing neuron precursors express neuron-specific tubulin. *Journal*  
554 *of Neurobiology* **27**, 26–43 (1995).
- 555 43. Moreno, N., Domínguez, L., Rétaux, S. & González, A. Islet1 as a marker of subdivisions and cell  
556 types in the developing forebrain of *Xenopus*. *Neuroscience* **154**, 1423–1439 (2008).
- 557 44. Pfaff, S. L., Mendelsohn, M., Stewart, C. L., Edlund, T. & Jessell, T. M. Requirement for LIM  
558 homeobox gene *Isl1* in motor neuron generation reveals a motor neuron-dependent step in  
559 interneuron differentiation. *Cell* **84**, 309–320 (1996).
- 560 45. López-Otín, C., Blasco, M. A., Partridge, L., Serrano, M. & Kroemer, G. Hallmarks of aging: An  
561 expanding universe. *Cell* doi:10.1016/j.cell.2022.11.001.
- 562 46. Sebastiani, P. & Perls, T. T. The Genetics of Extreme Longevity: Lessons from the New England  
563 Centenarian Study. *Frontiers in Genetics* **3**, 277 (2012).
- 564 47. Newman, A. B. *et al.* Health and function of participants in the Long Life Family Study: A  
565 comparison with other cohorts. *Aging (Albany NY)* **3**, 63–76 (2011).
- 566 48. Sebastiani, P. *et al.* A Family Longevity Selection Score: Ranking Sibships by Their Longevity,  
567 Size, and Availability for Study. *Am J Epidemiol* **170**, 1555–1562 (2009).
- 568 49. Adams, E. R., Nolan, V. G., Andersen, S. L., Perls, T. T. & Terry, D. F. Centenarian offspring: start  
569 healthier and stay healthier. *J Am Geriatr Soc* **56**, 2089–2092 (2008).
- 570 50. Terry, D. F., Wilcox, M., McCormick, M. A., Lawler, E. & Perls, T. T. Cardiovascular advantages  
571 among the offspring of centenarians. *J Gerontol A Biol Sci Med Sci* **58**, M425-431 (2003).

- 572 51. Horvath, S. *et al.* Decreased epigenetic age of PBMCs from Italian semi-supercentenarians and  
573 their offspring. *Aging* **7**, (2015).
- 574 52. Sebastiani, P. *et al.* Protein signatures of centenarians and their offspring suggest centenarians  
575 age slower than other humans. *Aging Cell* **20**, e13290 (2021).
- 576 53. Lu, A. T. *et al.* DNA methylation GrimAge strongly predicts lifespan and healthspan. *Aging* **11**,  
577 303–327 (2019).
- 578 54. Lu, A. T. *et al.* Universal DNA methylation age across mammalian tissues. *Nat Aging* **3**, 1144–  
579 1166 (2023).
- 580 55. Belsky, D. W. *et al.* Quantification of the pace of biological aging in humans through a blood test,  
581 the DunedinPoAm DNA methylation algorithm. *eLife* **9**, e54870.
- 582 56. Zhang, Z. D. *et al.* Genetics of extreme human longevity to guide drug discovery for healthy  
583 ageing. *Nat Metab* **2**, 663–672 (2020).
- 584 57. Sebastiani, P. *et al.* APOE Alleles and Extreme Human Longevity. *J Gerontol A Biol Sci Med Sci*  
585 **74**, 44–51 (2019).
- 586 58. Muller-Gerards, D. *et al.* Subjective cognitive decline, APOE epsilon4, and incident mild cognitive  
587 impairment in men and women. *Alzheimers Dement (Amst)* **11**, 221–230.
- 588 59. Tian, X. *et al.* High-molecular-mass hyaluronan mediates the cancer resistance of the naked mole  
589 rat. *Nature* **499**, 346–349 (2013).
- 590 60. Kuznetsova, I. L., Uralsky, L. I., Tyazhelova, T. V., Andreeva, T. V. & Rogaev, E. I. Mosaic loss of  
591 the Y chromosome in human neurodegenerative and oncological diseases. *Vavilovskii Zhurnal*  
592 *Genet Seleksii* **27**, 502–511 (2023).
- 593 61. Thompson, D. J. *et al.* Genetic predisposition to mosaic Y chromosome loss in blood. *Nature* **575**,  
594 652–657 (2019).



- 595 62. Sano, S. *et al.* Hematopoietic loss of Y chromosome leads to cardiac fibrosis and heart failure  
596 mortality. *Science* **377**, 292–297 (2022).
- 597 63. Mikkelsen, T. S. *et al.* Dissecting direct reprogramming through integrative genomic analysis.  
598 *Nature* **454**, 49–55 (2008).
- 599 64. Macip, C. C. *et al.* Gene Therapy Mediated Partial Reprogramming Extends Lifespan and  
600 Reverses Age-Related Changes in Aged Mice. (2023) doi:10.1101/2023.01.04.522507.
- 601 65. Ocampo, A. *et al.* In Vivo Amelioration of Age-Associated Hallmarks by Partial Reprogramming.  
602 *Cell* **167**, 1719–1733.e12 (2016).
- 603 66. Olova, N., Simpson, D. J., Marioni, R. E. & Chandra, T. Partial reprogramming induces a steady  
604 decline in epigenetic age before loss of somatic identity. *Aging Cell* **18**, e12877 (2019).
- 605 67. López-Otín, C., Blasco, M. A., Partridge, L., Serrano, M. & Kroemer, G. The Hallmarks of Aging.  
606 *Cell* **153**, 1194–1217 (2013).
- 607 68. Yang, J.-H. *et al.* Loss of epigenetic information as a cause of mammalian aging. *Cell* **186**, 305-  
608 326.e27 (2023).
- 609 69. Kondo, T. *et al.* iPSC-Based Compound Screening and In Vitro Trials Identify a Synergistic Anti-  
610 amyloid  $\beta$  Combination for Alzheimer's Disease. *Cell Reports* **21**, 2304–2312 (2017).
- 611 70. Moreno, C. L. *et al.* iPSC-derived familial Alzheimer's PSEN2 N141I cholinergic neurons exhibit  
612 mutation-dependent molecular pathology corrected by insulin signaling. *Molecular*  
613 *Neurodegeneration* **13**, 33 (2018).
- 614 71. Ortiz-Virumbrales, M. *et al.* CRISPR/Cas9-Correctable mutation-related molecular and  
615 physiological phenotypes in iPSC-derived Alzheimer's PSEN2N141I neurons. *acta neuropathol*  
616 *commun* **5**, 77 (2017).

- 617 72. Mahoney, F. I. & Barthel, D. W. Functional Evaluation: The Barthel Index. *Md State Med J* **14**, 61–  
618 65 (1965).
- 619 73. Fillenbaum, G. G. Screening the elderly. A brief instrumental activities of daily living measure. *J*  
620 *Am Geriatr Soc* **33**, 698–706 (1985).
- 621 74. Blessed, G., Tomlinson, B. E. & Roth, M. The association between quantitative measures of  
622 dementia and of senile change in the cerebral grey matter of elderly subjects. *Br J Psychiatry* **114**,  
623 797–811 (1968).
- 624 75. Holtze, S. *et al.* Alternative Animal Models of Aging Research. *Frontiers in Molecular Biosciences*  
625 **8**, 660959 (2021).
- 626 76. Park, L. M., Lannigan, J. & Jaimes, M. C. OMIP-069: Forty-Color Full Spectrum Flow Cytometry  
627 Panel for Deep Immunophenotyping of Major Cell Subsets in Human Peripheral Blood. *Cytometry*  
628 *A* **97**, 1044–1051 (2020).
- 629 77. Belkina, A. C. *et al.* Automated optimized parameters for T-distributed stochastic neighbor  
630 embedding improve visualization and analysis of large datasets. *Nature Communications* **10**,  
631 5415 (2019).
- 632 78. Van Gassen, S. *et al.* FlowSOM: Using self-organizing maps for visualization and interpretation of  
633 cytometry data. *Cytometry A* **87**, 636–645 (2015).
- 634 79. Zhou, W., Triche, T. J., Laird, P. W. & Shen, H. SeSAmE: reducing artifactual detection of DNA  
635 methylation by Infinium BeadChips in genomic deletions. *Nucleic Acids Research* **46**, gky691-  
636 (2018).
- 637 80. Piao, Y.-H. *et al.* Methylome-wide Association Study of Patients with Recent-onset Psychosis. *Clin*  
638 *Psychopharmacol Neurosci* **20**, 462–473 (2022).
- 639

**Table 1. Cognitive and functional status of EL subjects.**

| <b>Centenarians</b>      |                          |                                           |                                       |
|--------------------------|--------------------------|-------------------------------------------|---------------------------------------|
| <b>Age at Draw</b>       | <b>Sex (N)</b>           | <b>Cognitively healthy at age 100 (N)</b> | <b>ADL independent at age 100 (N)</b> |
| 100-104                  | Male (10)<br>Female (11) | Yes (4)<br>No (3)<br>Unknown (14)         | Yes (12)<br>No (2)<br>Unknown (7)     |
| 105-109                  | Male (6)<br>Female (7)   | Yes (3)<br>No (0)<br>Unknown (10)         | Yes (4)<br>No (3)<br>Unknown (6)      |
| 110+                     | Male (0)<br>Female (2)   | Yes (1)<br>No (0)<br>Unknown (1)          | Yes (1)<br>No (0)<br>Unknown (1)      |
| <b>Offspring</b>         |                          |                                           |                                       |
| <b>Age at Draw</b>       | <b>Sex (N)</b>           | <b>Cognitively healthy (N)</b>            | <b>IADL independent (N)</b>           |
| 60-69                    | Male (1)<br>Female (4)   | Yes (3)<br>No (0)<br>Unknown (2)          | Yes (5)<br>No (0)<br>Unknown (0)      |
| 70-79                    | Male (4)<br>Female (5)   | Yes (6)<br>No (1)<br>Unknown (2)          | Yes (9)<br>No (0)<br>Unknown (0)      |
| 80+                      | Male (0)<br>Female (2)   | Yes (0)<br>No (1)<br>Unknown (1)          | Yes (2)<br>No (0)<br>Unknown (0)      |
| <b>Offspring Spouses</b> |                          |                                           |                                       |
| <b>Age at Draw</b>       | <b>Sex (N)</b>           | <b>Cognitively healthy (N)</b>            | <b>IADL independent (N)</b>           |
| 80+                      | Male (2)<br>Female (0)   | Yes (0)<br>No (0)<br>Unknown (2)          | Yes (2)<br>No (0)<br>Unknown (0)      |

**Table 1. Cognitive and functional status of EL subjects.** Demographic (age, sex), cognitive, and functional status of subjects in this bank are organized by age bracket and separated by cohort (Centenarian, Offspring, and Offspring Spouses) with number of subjects listed next to each identifier. Cognitive status is determined by clinical consensus review of neuropsychological assessment scores or cognitive screeners detailed in the methods. Functional independence status was determined by performance on the Barthel Activities of Daily Living Index (ADLs) for centenarians and Instrumental Activities of Daily Living (IADLs) for offspring and spouses.

## Figure 1. Comparisons of biological versus chronological age in EL subjects.

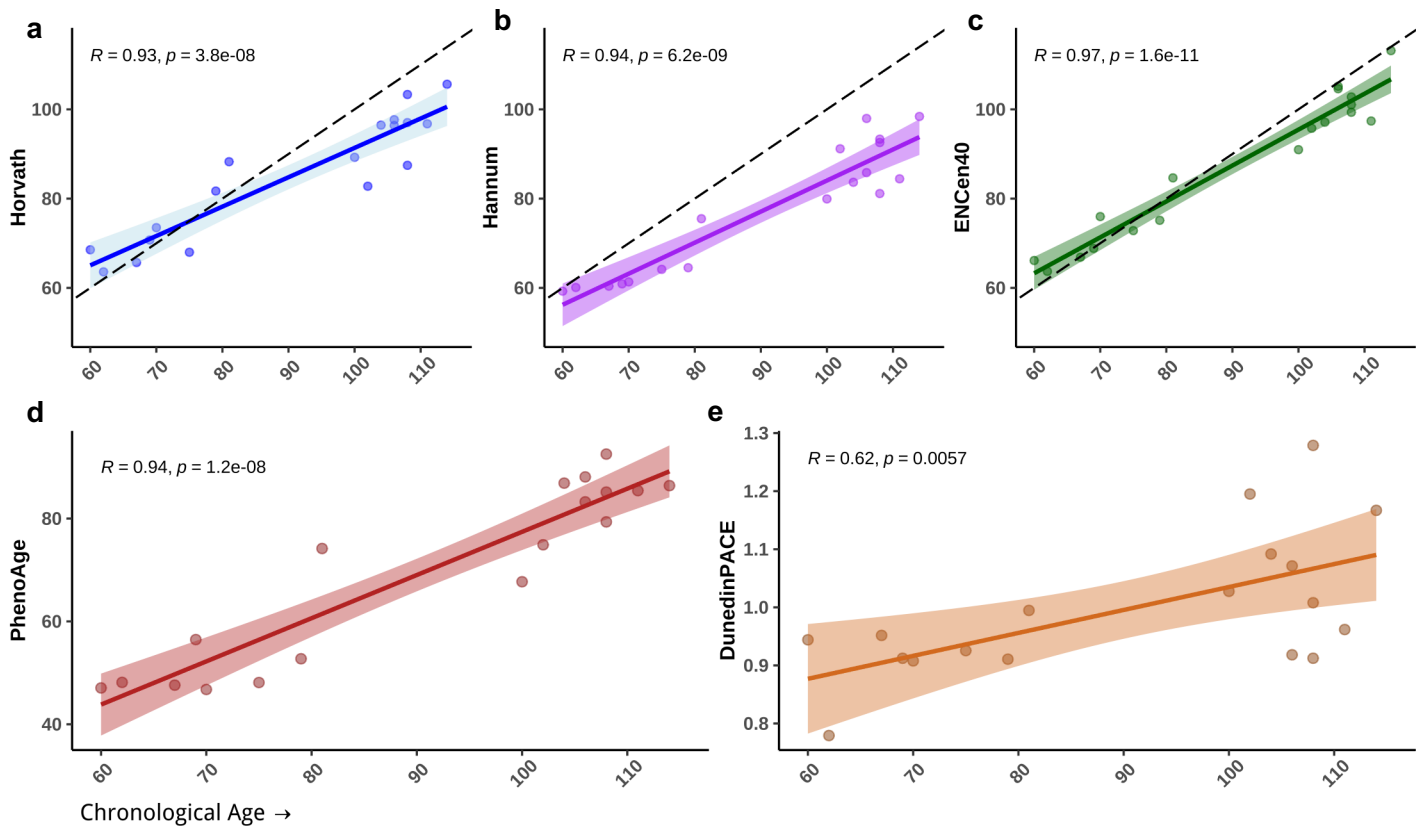

**Figure 1. Comparisons of biological versus chronological age in EL subjects.** Parallel age estimates from five well-established models of epigenetic aging for EL PBMCs. The colored lines represent the best linear fit from each model, while the dotted black lines show a theoretical perfect linear correlation for reference, where applicable. Each data point represents an individual within our bank. The top three panels show models trained on chronological age including the original 2013 pan-tissue Horvath (a), Hannum (b), and ENcen40+ (c) clocks. Panels d and e show predictions from models (PhenoAge and DunedinPACE) trained with the additional aid of clinical and phenotypic measurements. These clocks return more novel measurements that align more closely to a putative biological age, or rate of age acceleration, as opposed to chronological age.

**Table 2. Demographic information of EL and non-EL PBMC and iPSC lines.**

| <b>Age</b>      | <b>Sex</b> | <b>PBMC Collected</b> | <b>iPSC Generated</b> |
|-----------------|------------|-----------------------|-----------------------|
| 100-104         | Male       | 10                    | 1                     |
|                 | Female     | 11                    | 2                     |
| 105-109         | Male       | 6                     | 5                     |
|                 | Female     | 7                     | 5                     |
| 110+            | Male       | 0                     | 0                     |
|                 | Female     | 2                     | 2                     |
| EL Offspring    | Male       | 5                     | 1                     |
|                 | Female     | 11                    | 3                     |
| Non-EL controls | Male       | 2                     | 0                     |
|                 | Female     | 0                     | 0                     |
| <b>Total</b>    |            | <b>54</b>             | <b>19</b>             |

**Table 2. Demographic information of EL and non-EL PBMC and iPSC lines.** EL Subjects are classified by age group, sex, and EL status. Included in this table are centenarian offspring as well as non-EL controls in the offspring age group.

## Figure 2. Representative characterization of EL-specific iPSCs.

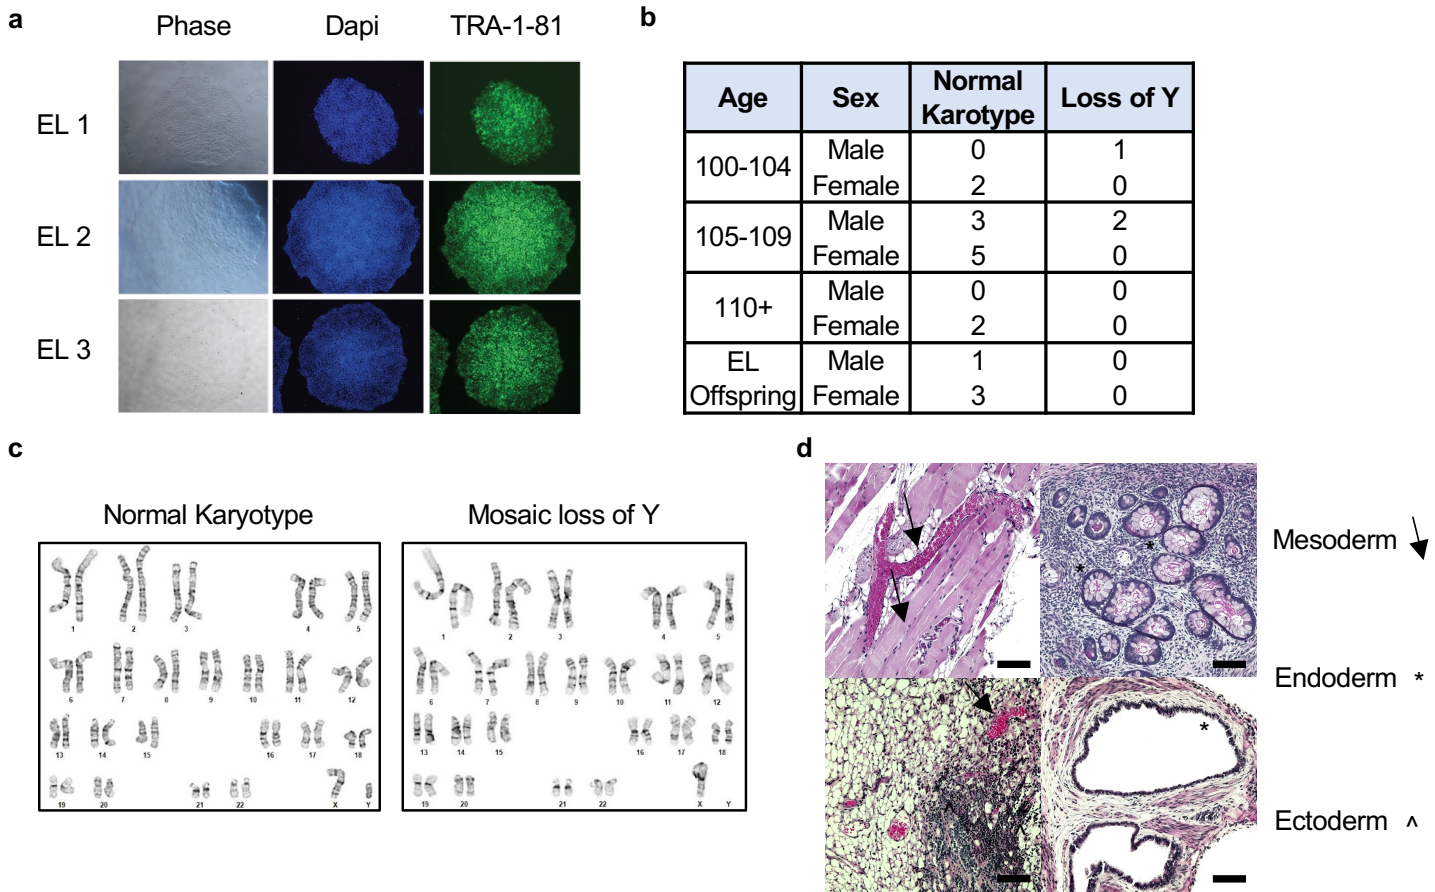

**Figure 2. Representative characterization of EL-specific iPSCs.** **a)** Representative images of iPSC lines under brightfield (left), DAPI (middle), and TRA-1-81 (right). Images taken at 10X magnification. **b)** Table of iPSC lines generated including demographic information (age, sex) and karyotype outcome based on g-band analyses. **c)** Representative karyotype reports of male EL iPSCs showing a normal karyotype (left) and mosaic loss of y chromosome (right). **d)** Representative images of teratoma mass hematoxylin and eosin stains from EL iPSC lines representing mesoderm (arrows), endoderm (asterisks) and ectoderm (accent) tissue. Scale bars: 100  $\mu$ M.

### Figure 3. Forward programming of EL-specific iPSCs into cortical neurons.

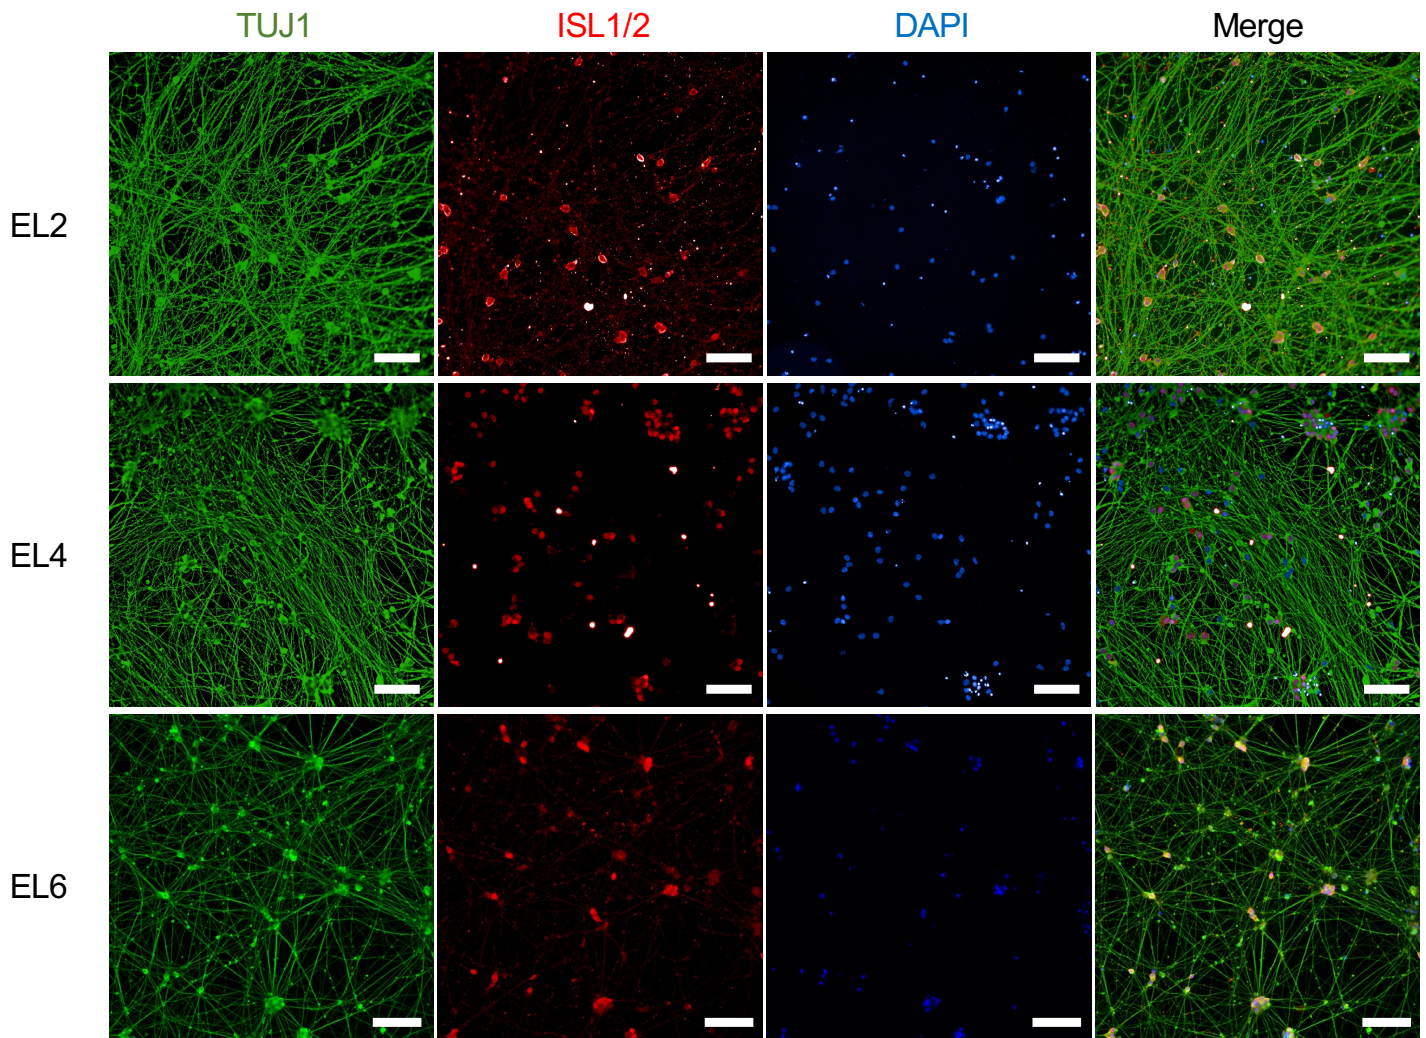

**Figure 3. Forward programming of EL-specific iPSCs into cortical neurons.** Representative images from EL iPSC lines brought through directed differentiation to forebrain cortical neurons. Maturation markers TUJ1 (green), ISLET1/2 (red), and DAPI (blue) are shown. Scale bars: 100  $\mu$ M.
